# Supplementary material for: Electrochemical illumination of thienyl and ferrocenyl chromium(0) Fischer carbene complexes
Source: Royal Society of Chemistry journal article supplement (doi:10.1039/c3dt32913e), 2013-01-01
Supplement: c3dt32913e.pdf [file c3dt32913e.pdf]

Cartesian coordinates (in Å) and total energies (in a. u., zero-point vibrational energy included) of all the stationary points discussed in the text. All calculations have been performed at the B3LYP/def2-SVP level.

**1:** E= -3452.560915

|    |              |              |              |
|----|--------------|--------------|--------------|
| Cr | -2.082751000 | -0.438276000 | -0.073553000 |
| C  | -3.557017000 | -1.530743000 | -0.520982000 |
| O  | -4.454410000 | -2.197445000 | -0.794939000 |
| C  | -2.256447000 | 0.436102000  | -1.752284000 |
| O  | -2.387759000 | 0.908366000  | -2.794662000 |
| C  | -3.317710000 | 0.757445000  | 0.747247000  |
| O  | -4.119171000 | 1.419359000  | 1.241578000  |
| C  | -1.938051000 | -1.355023000 | 1.595039000  |
| O  | -1.886758000 | -1.920299000 | 2.593174000  |
| C  | -0.960579000 | -1.714052000 | -0.925687000 |
| O  | -0.337516000 | -2.513364000 | -1.471425000 |
| C  | -0.421213000 | 0.720659000  | 0.488644000  |
| O  | -0.278439000 | 2.033157000  | 0.413744000  |
| C  | -1.218005000 | 2.958810000  | -0.155531000 |
| H  | -2.172318000 | 2.880274000  | 0.381674000  |
| H  | -1.387282000 | 2.695704000  | -1.208538000 |
| C  | -0.627714000 | 4.348892000  | -0.023234000 |
| H  | -0.456685000 | 4.607072000  | 1.033046000  |
| H  | -1.322946000 | 5.088048000  | -0.450191000 |
| H  | 0.329968000  | 4.426266000  | -0.560413000 |
| Fe | 2.566462000  | -0.182000000 | 0.126494000  |
| C  | 0.799500000  | 0.213419000  | 1.133835000  |
| C  | 1.881257000  | 1.043425000  | 1.633525000  |
| H  | 1.892008000  | 2.129618000  | 1.619386000  |
| C  | 2.893140000  | 0.197375000  | 2.153226000  |
| H  | 3.834568000  | 0.523708000  | 2.593262000  |
| C  | 2.479945000  | -1.158746000 | 1.969956000  |
| H  | 3.051661000  | -2.044734000 | 2.242060000  |
| C  | 1.207039000  | -1.158534000 | 1.343457000  |
| H  | 0.649270000  | -2.049133000 | 1.073246000  |
| C  | 2.272962000  | -0.052233000 | -1.929203000 |
| H  | 1.308159000  | 0.089427000  | -2.413473000 |
| C  | 3.150737000  | 0.985036000  | -1.486417000 |
| H  | 2.979168000  | 2.055994000  | -1.583028000 |
| C  | 4.289127000  | 0.367075000  | -0.883610000 |
| H  | 5.135292000  | 0.884329000  | -0.433205000 |
| C  | 4.111147000  | -1.048949000 | -0.951697000 |
| H  | 4.798590000  | -1.799087000 | -0.563066000 |
| C  | 2.863482000  | -1.308252000 | -1.598016000 |
| H  | 2.421366000  | -2.285283000 | -1.783720000 |

**3:** E= -2355.048309

|   |              |              |              |
|---|--------------|--------------|--------------|
| O | -1.068277000 | 1.700050000  | -0.074981000 |
| O | 0.571639000  | -2.266826000 | -2.224120000 |
| O | 4.092218000  | -1.497090000 | 0.036995000  |
| O | 2.312865000  | 1.619272000  | -2.142402000 |
| C | -0.664495000 | 0.438926000  | -0.034180000 |
| C | -1.875890000 | -0.375215000 | -0.012444000 |
| C | -2.043329000 | -1.757254000 | -0.002739000 |
| H | -1.214936000 | -2.460947000 | -0.006697000 |
| C | -3.395953000 | -2.168819000 | 0.007494000  |
| H | -3.714807000 | -3.211736000 | 0.015590000  |
| C | -4.268583000 | -1.100602000 | 0.006474000  |

|    |              |              |              |
|----|--------------|--------------|--------------|
| H  | -5.358210000 | -1.138266000 | 0.015634000  |
| C  | -0.231783000 | 2.866367000  | -0.154927000 |
| H  | 0.197456000  | 2.912403000  | -1.166424000 |
| H  | 0.588751000  | 2.779791000  | 0.567972000  |
| C  | -1.101736000 | 4.073968000  | 0.130861000  |
| H  | -0.497042000 | 4.990640000  | 0.054035000  |
| H  | -1.526206000 | 4.023563000  | 1.145056000  |
| H  | -1.930170000 | 4.144335000  | -0.590241000 |
| C  | 0.825585000  | -1.524661000 | -1.385074000 |
| C  | 3.035255000  | -1.043173000 | 0.024393000  |
| C  | 1.892013000  | 0.920203000  | -1.331268000 |
| C  | 0.792289000  | -1.547131000 | 1.354916000  |
| O  | 0.531746000  | -2.301646000 | 2.181053000  |
| C  | 1.821867000  | 0.890223000  | 1.390024000  |
| O  | 2.187841000  | 1.571955000  | 2.241626000  |
| Cr | 1.294904000  | -0.302337000 | 0.001529000  |
| S  | -3.459889000 | 0.410851000  | -0.011135000 |

**4:** E= -2413.715244

|    |              |              |              |
|----|--------------|--------------|--------------|
| 16 | 0.107432000  | 3.364809000  | 0.389230000  |
| 6  | -0.711289000 | 1.922906000  | -0.235478000 |
| 6  | -2.005201000 | 2.254611000  | -0.597268000 |
| 6  | -2.323554000 | 3.626461000  | -0.405079000 |
| 6  | -1.283294000 | 4.346357000  | 0.130252000  |
| 6  | 0.001757000  | 0.636931000  | -0.318460000 |
| 24 | -0.982493000 | -1.218881000 | 0.066007000  |
| 6  | 0.238983000  | -1.551135000 | 1.487833000  |
| 8  | 0.969305000  | -1.762816000 | 2.351831000  |
| 7  | 1.292084000  | 0.819753000  | -0.579845000 |
| 6  | 2.388520000  | -0.143811000 | -0.648938000 |
| 6  | 3.689176000  | 0.468595000  | -0.127233000 |
| 6  | -2.202572000 | -0.910117000 | -1.359384000 |
| 8  | -2.952270000 | -0.762203000 | -2.220275000 |
| 6  | -1.870110000 | -2.830582000 | 0.461149000  |
| 8  | -2.410560000 | -3.818183000 | 0.705474000  |
| 6  | 0.102812000  | -2.167958000 | -1.172140000 |
| 8  | 0.713716000  | -2.788986000 | -1.925212000 |
| 6  | -2.145488000 | -0.330843000 | 1.294252000  |
| 8  | -2.869518000 | 0.155661000  | 2.041208000  |
| 1  | -2.707236000 | 1.538155000  | -1.017924000 |
| 1  | -3.296540000 | 4.060436000  | -0.639576000 |
| 1  | -1.272704000 | 5.395772000  | 0.423169000  |
| 1  | 2.515947000  | -0.477128000 | -1.693975000 |
| 1  | 2.121332000  | -1.026575000 | -0.059591000 |
| 6  | 4.872219000  | -0.501260000 | -0.203844000 |
| 1  | 3.538622000  | 0.794124000  | 0.917376000  |
| 1  | 3.927618000  | 1.381069000  | -0.706527000 |
| 6  | 6.179031000  | 0.099970000  | 0.314287000  |
| 1  | 4.630259000  | -1.412210000 | 0.371955000  |
| 1  | 5.004415000  | -0.831667000 | -1.249835000 |
| 1  | 7.006875000  | -0.622752000 | 0.244874000  |
| 1  | 6.467983000  | 0.993611000  | -0.263873000 |
| 1  | 6.089798000  | 0.403521000  | 1.370511000  |
| 1  | 1.598640000  | 1.773038000  | -0.793417000 |

**1<sup>+</sup>:** E= -4504.394840

|    |             |              |              |
|----|-------------|--------------|--------------|
| Cr | 2.165204000 | -0.417793000 | 0.112603000  |
| C  | 3.687577000 | -1.506740000 | 0.590577000  |
| O  | 4.579894000 | -2.160037000 | 0.875208000  |
| C  | 2.603694000 | 0.687002000  | 1.618896000  |
| O  | 2.916311000 | 1.285450000  | 2.544383000  |
| C  | 3.314019000 | 0.659713000  | -1.003953000 |

|    |              |              |              |
|----|--------------|--------------|--------------|
| O  | 4.012225000  | 1.274036000  | -1.669204000 |
| C  | 1.891464000  | -1.608551000 | -1.361776000 |
| O  | 1.758497000  | -2.342002000 | -2.231822000 |
| C  | 1.076441000  | -1.477840000 | 1.248521000  |
| O  | 0.400425000  | -2.095221000 | 1.946425000  |
| C  | 0.515770000  | 0.643046000  | -0.394118000 |
| O  | 0.256207000  | 1.937668000  | -0.332885000 |
| C  | 1.183662000  | 2.960665000  | 0.102845000  |
| H  | 2.167951000  | 2.758073000  | -0.337721000 |
| H  | 1.267834000  | 2.894860000  | 1.197014000  |
| C  | 0.639822000  | 4.303817000  | -0.334936000 |
| H  | 0.563359000  | 4.365741000  | -1.431060000 |
| H  | 1.320933000  | 5.099335000  | 0.003209000  |
| H  | -0.351656000 | 4.497864000  | 0.101830000  |
| Fe | -2.683880000 | -0.205027000 | -0.153769000 |
| C  | -0.703673000 | 0.039257000  | -1.029369000 |
| C  | -1.681114000 | 0.787535000  | -1.774959000 |
| H  | -1.653499000 | 1.864672000  | -1.924656000 |
| C  | -2.671613000 | -0.103357000 | -2.265773000 |
| H  | -3.532058000 | 0.169834000  | -2.876296000 |
| C  | -2.339293000 | -1.419627000 | -1.814960000 |
| H  | -2.894993000 | -2.333323000 | -2.023673000 |
| C  | -1.139690000 | -1.330575000 | -1.048954000 |
| H  | -0.653958000 | -2.170352000 | -0.560296000 |
| C  | -2.910842000 | 0.863754000  | 1.644382000  |
| H  | -2.239014000 | 1.660132000  | 1.962033000  |
| C  | -4.104272000 | 1.031059000  | 0.880033000  |
| H  | -4.494898000 | 1.974069000  | 0.498006000  |
| C  | -4.683654000 | -0.252878000 | 0.678129000  |
| H  | -5.587692000 | -0.463058000 | 0.106542000  |
| C  | -3.849394000 | -1.220156000 | 1.308455000  |
| H  | -4.015137000 | -2.297161000 | 1.319216000  |
| C  | -2.750775000 | -0.533497000 | 1.912582000  |
| H  | -1.938441000 | -0.997866000 | 2.470794000  |

**3<sup>+</sup>**: E= -2354.796693

|    |              |              |              |
|----|--------------|--------------|--------------|
| O  | 1.050752000  | 1.717252000  | -0.170723000 |
| O  | -0.493567000 | -2.098964000 | 2.408106000  |
| O  | -4.182416000 | -1.514386000 | 0.117929000  |
| O  | -2.057059000 | 1.614391000  | 2.302349000  |
| C  | 0.703010000  | 0.458708000  | -0.077920000 |
| C  | 1.885274000  | -0.357895000 | -0.023696000 |
| C  | 2.036049000  | -1.749954000 | 0.055464000  |
| H  | 1.205928000  | -2.452849000 | 0.091755000  |
| C  | 3.376189000  | -2.171891000 | 0.076340000  |
| H  | 3.691670000  | -3.213864000 | 0.134201000  |
| C  | 4.258541000  | -1.104902000 | 0.014220000  |
| H  | 5.348577000  | -1.154335000 | 0.017287000  |
| C  | 0.204249000  | 2.881528000  | -0.336783000 |
| H  | -0.778090000 | 2.687651000  | 0.112590000  |
| H  | 0.076770000  | 3.022029000  | -1.421492000 |
| C  | 0.893754000  | 4.067098000  | 0.301964000  |
| H  | 0.287573000  | 4.970643000  | 0.136639000  |
| H  | 1.885276000  | 4.232760000  | -0.144062000 |
| H  | 1.011526000  | 3.923415000  | 1.386320000  |
| C  | -0.763914000 | -1.455840000 | 1.511510000  |
| C  | -3.137095000 | -1.079507000 | 0.077595000  |
| C  | -1.767246000 | 0.933551000  | 1.438446000  |
| C  | -0.814333000 | -1.574060000 | -1.419315000 |
| O  | -0.560899000 | -2.291534000 | -2.263233000 |
| C  | -1.853888000 | 0.820581000  | -1.497163000 |
| O  | -2.201145000 | 1.436771000  | -2.387148000 |
| Cr | -1.289271000 | -0.311332000 | 0.003668000  |
| S  | 3.477773000  | 0.408987000  | -0.073968000 |

**4<sup>+</sup>**: E= -2413.471213

|    |              |              |              |
|----|--------------|--------------|--------------|
| S  | -0.048605000 | 3.373812000  | 0.285535000  |
| C  | -0.804763000 | 1.878276000  | -0.280366000 |
| C  | -2.144782000 | 2.118442000  | -0.564193000 |
| C  | -2.539991000 | 3.463272000  | -0.359533000 |
| C  | -1.512720000 | 4.251634000  | 0.107101000  |
| C  | -0.011415000 | 0.656039000  | -0.402642000 |
| Cr | -0.920275000 | -1.225112000 | 0.078633000  |
| C  | 0.401084000  | -1.382814000 | 1.492763000  |
| O  | 1.166287000  | -1.459020000 | 2.333323000  |
| N  | 1.255490000  | 0.872290000  | -0.702786000 |
| C  | 2.402330000  | -0.037913000 | -0.793702000 |
| C  | 3.638740000  | 0.555737000  | -0.113723000 |
| C  | -2.223406000 | -1.040550000 | -1.352163000 |
| O  | -2.977575000 | -0.975484000 | -2.203193000 |
| C  | -1.689363000 | -2.991065000 | 0.598288000  |
| O  | -2.121548000 | -3.995527000 | 0.897669000  |
| C  | 0.112558000  | -2.150492000 | -1.319109000 |
| O  | 0.655073000  | -2.699297000 | -2.153136000 |
| C  | -2.053615000 | -0.361865000 | 1.467342000  |
| O  | -2.700284000 | 0.087693000  | 2.283094000  |
| H  | -2.829372000 | 1.365400000  | -0.949390000 |
| H  | -3.548777000 | 3.835984000  | -0.540147000 |
| H  | -1.549771000 | 5.304951000  | 0.386193000  |
| H  | 2.610225000  | -0.229115000 | -1.861125000 |
| H  | 2.137621000  | -0.995811000 | -0.332847000 |
| C  | 4.863576000  | -0.360502000 | -0.217417000 |
| H  | 3.406373000  | 0.755637000  | 0.947035000  |
| H  | 3.872553000  | 1.533732000  | -0.573532000 |
| C  | 6.108418000  | 0.232674000  | 0.443316000  |
| H  | 4.627444000  | -1.335633000 | 0.245209000  |
| H  | 5.071637000  | -0.570379000 | -1.281754000 |
| H  | 6.966320000  | -0.450257000 | 0.353051000  |
| H  | 6.393985000  | 1.189049000  | -0.024122000 |
| H  | 5.943585000  | 0.420685000  | 1.516743000  |
| H  | 1.518512000  | 1.839268000  | -0.919390000 |
